# Supplementary material
Source: PubMed Central journal article supplement (PMC7832801)
Supplement: mmc1.pdf [file mmc1.pdf]

|    | <b>Symptom</b>      | <b>Synonyms (separated by commas)</b>                                                                                                                     |
|----|---------------------|-----------------------------------------------------------------------------------------------------------------------------------------------------------|
| 1  | Anorexia            | anorexia, loss of appetite                                                                                                                                |
| 2  | Fatigue             | fatigue, Fatigue, tired, poor physical condition, malaise, general malaise, weakness, weak, lack of energy                                                |
| 3  | Conjunctivitis      | conjunctivitis, eye irritation                                                                                                                            |
| 4  | Cough               | cough, mild coughing, Cough, coughing, dry cough, mild cough                                                                                              |
| 5  | Fever               | fever, Fever                                                                                                                                              |
| 6  | Myalgias            | myalgias, myalgia, muscle pain, muscle aches, muscle soreness, aching muscles, muscular stiffness, muscular soreness, sore muscle, joint pain, sore limbs |
| 7  | Sore Throat         | sore throat, dry throat, sore throa, throat discomfort, Sore throat, acute pharyngitis, pharynx, pharyngalgia, pharyngeal discomfort, Pharyngeal dryness  |
| 8  | Shortness of Breath | shortness of breath, difficulty breathing, shortness breath, breathing difficulty, respiratory problems, respiratory distress, dyspnea, severe dyspnea    |
| 9  | Sputum              | sputum, Sputum, expectoration, phlegm                                                                                                                     |
| 10 | Runny Nose          | runny nose, nasal discharge, rhinorrhoea, rhinorrhea                                                                                                      |
| 11 | Diarrhea            | diarrhea                                                                                                                                                  |
| 12 | Headache            | headache, Headache                                                                                                                                        |
| 13 | Pneumonia           | pneumonia, severe pneumonia, pneumonitis, pulmonary inflammation                                                                                          |
| 14 | Abdominal Pain      | abdominal pain                                                                                                                                            |
| 15 | Pleural Effusion    | pleural effusion                                                                                                                                          |
| 16 | Chest Pain          | chest pain, pleuritic chest pain, chest distress, chest tightness                                                                                         |
| 17 | Vomiting            | nausea, vomiting, esophageal reflux, reflux                                                                                                               |
| 18 | Flu                 | flu-like symptoms, flu                                                                                                                                    |
| 19 | Chill               | chills, chill                                                                                                                                             |
| 20 | Sweating            | sweating                                                                                                                                                  |
